# Supplementary material
Source: PubMed Central journal article supplement (PMC4415526)
Supplement: NIHMS607445-supplement-supplemental_material.pdf [file NIHMS607445-supplement-supplemental_material.pdf]

## **SUPPLEMENTAL MATERIAL**

**Title:** Sex Differences in Long-term Mortality after Myocardial Infarction: A Systematic Review

**Authors:** Emily M. Bucholz, MPH, Neel M. Butala, BA, Saif S. Rathore, MD, PhD, MPH, Rachel P. Dreyer, PhD, Alexandra J. Lansky, MD, Harlan M. Krumholz, MD, SM

**Supplemental Tables:** 3

**Supplemental Figures:** 1

**Supplemental Table S1.** Characteristics of excluded studies

| <b>Author, Year</b>                                       | <b>Study Name, Years of Inclusion</b>            | <b>Same Study Population</b> | <b>Reason for Exclusion</b>                                                                                                         |
|-----------------------------------------------------------|--------------------------------------------------|------------------------------|-------------------------------------------------------------------------------------------------------------------------------------|
| Crowley, 2003 <sup>S1</sup>                               | Worcester Heart Attack Study, 1975-1999          | Goldberg, 1993               | - Limited to diabetics only<br>- Shorter follow-up of 5 years                                                                       |
| Donahue, 1993 <sup>S2</sup>                               | Worcester Heart Attack Study, 1974-1986          | Goldberg, 1993               | - Older study<br>- Results are stratified by diabetes                                                                               |
| Eliasson, 2011 <sup>S3</sup>                              | Northern Sweden MONICA Registry, 1989-2006       | Isaksson 2011                | - No adjusted gender estimates reported                                                                                             |
| Galatius, 1998 <sup>S4</sup>                              | Danish Verapamil Infarction Trial, 1979-1981     | Galatius-Jensen, 1996        | - Includes probable and no infarction patients<br>- Primary outcome reinfarction                                                    |
| Grundtvig, 2012 <sup>S5</sup>                             |                                                  | Grundtvig, 2011              | - No adjusted gender estimates                                                                                                      |
| Herlitz 1996 ( <i>Clinical Cardiology</i> ) <sup>S6</sup> | Sahlgrenska University Hospital, 1986-1987       | Welin, 2000                  | - No adjusted gender estimates reported                                                                                             |
| Herlitz 1996 ( <i>Amer J Hypertens</i> ) <sup>S7</sup>    | Sahlgrenska University Hospital, 1986-1987       | Welin, 2000                  | - No adjusted gender estimates reported<br>- Shorter follow-up of 5 years                                                           |
| Herlitz 1997 <sup>S8</sup>                                | Sahlgrenska University Hospital, 1986-1987       | Welin, 2000                  | - No adjusted gender estimates reported<br>- Strong suspicion and vague suspicion of AMI included<br>- Shorter follow-up of 5 years |
| Koek 2007 <sup>S9</sup>                                   | Dutch National Hospital Discharge Register, 1995 | Koek, 2006                   | - Results stratified by diabetes                                                                                                    |
| Launbjerg 1994 ( <i>BMJ</i> ) <sup>S10</sup>              | Danish Verapamil Infarction Trial, 1979-1981     | Galatius-Jensen, 1996        | - Includes probable and no infarction<br>- No adjusted gender estimates reported                                                    |
| Launbjerg 1994 ( <i>Cardiology</i> ) <sup>S11</sup>       | Danish Verapamil Infarction Trial, 1979-1981     | Galatius-Jensen, 1996        | - Includes AMI and non-AMI patients<br>- No adjusted gender estimates reported                                                      |
| Norhammar 2008 <sup>S12</sup>                             | RIKS-HIA, 1995-2002                              | Lawesson 2012                | - Smaller sample size<br>- Results stratified by diabetes                                                                           |
| Peltonen 2000 <sup>S13</sup>                              | Northern Swedish MONICA Study, 1985-1994         | Isaksson 2011                | - No age-adjustment<br>- Shorter follow-up                                                                                          |

## REFERENCES

- S1. Crowley A, Menon V, Lessard D, Yarzebski J, Jackson E, Gore JM, Goldberg RJ. Sex differences in survival after acute myocardial infarction in patients with diabetes mellitus (Worcester Heart Attack Study). *Am Heart J.* 2003;146:824-31.
- S2. Donahue RP, Goldberg RJ, Chen Z, Gore JM, Alpert JS. The influence of sex and diabetes mellitus on survival following acute myocardial infarction: a community-wide perspective. *J Clin Epidemiol.* 1993;46:245-52.
- S3. Eliasson M, Jansson JH, Lundblad D, Naslund U. The disparity between long-term survival in patients with and without diabetes following a first myocardial infarction did not change between 1989 and 2006: an analysis of 6,776 patients in the Northern Sweden MONICA Study. *Diabetologia.* 2011;54:2538-43.
- S4. Galatius S, Launbjerg J, Mortensen LS, Hansen JF. 5993 survivors of suspected myocardial infarction. 10 year incidence of later myocardial infarction and subsequent mortality. *Eur Heart J.* 1998;19:564-9.
- S5. Grundtvig M, Hagen TP, Amrud ES, Reikvam A. Reduced life expectancy after an incident hospital diagnosis of acute myocardial infarction - Effects of smoking in women and men. *Int J Cardiol.* 2013;167:2792-7.
- S6. Herlitz J, Bang A, Hartford M, Karlson BW. Influence of gender on survival, mode of death, reinfarction, use of medication, and aspects of well being during a period of five years after onset of acute myocardial infarction. *Clin Cardiol.* 1996;19:555-61.
- S7. Herlitz J, Bang A, Karlson BW. Five-year prognosis after acute myocardial infarction in relation to a history of hypertension. *Am J Hypertens.* 1996;9:70-6.
- S8. Herlitz J, Karlson BW, Lindqvist J, Sjolín M. Long-term prognosis in men and women coming to the emergency department with chest pain or other symptoms suggestive of acute myocardial infarction. *Eur J Emerg Med.* 1997;4:196-203.
- S9. Koek HL, Soedamah-Muthu SS, Kardaun JW, Gevers E, de Bruin A, Reitsma JB, Bots ML, Grobbee DE. Short- and long-term mortality after acute myocardial infarction: comparison of patients with and without diabetes mellitus. *Eur J Epidemiol.* 2007;22:883-8.
- S10. Launbjerg J, Fruergaard P, Madsen JK, Mortensen LS, Hansen JF. Ten year mortality in patients with suspected acute myocardial infarction. *BMJ.* 1994;308:1196-9.
- S11. Launbjerg J, Fruergaard P, Madsen JK, Mortensen LS, Hansen JF. Ten-year mortality of patients admitted to coronary care units with and without myocardial infarction. Risk factors from medical history and diagnosis at discharge. DAVIT-Study Group. Danish Verapamil Infarction Trial. *Cardiology.* 1994;85:259-66.
- S12. Norhammar A, Stenestrand U, Lindback J, Wallentin L. Women younger than 65 years with diabetes mellitus are a high-risk group after myocardial infarction: a report from the Swedish Register of Information and Knowledge about Swedish Heart Intensive Care Admission (RIKS-HIA). *Heart.* 2008;94:1565-70.
- S13. Peltonen M, Lundberg V, Huhtasaari F, Asplund K. Marked improvement in survival after acute myocardial infarction in middle-aged men but not in women. The Northern Sweden MONICA study 1985-94. *J Intern Med.* 2000;247:579-87.

**Supplemental Table S2. Study quality characteristics**

| Study Characteristic                      | Reference                                                                      |
|-------------------------------------------|--------------------------------------------------------------------------------|
| <b>Study Design</b>                       |                                                                                |
| Source of data                            |                                                                                |
| Registries                                | 6,9,11,12,14,16,17,18,20,21,26,27,30,31,35,36,41,42,44                         |
| Randomized clinical trials                | 19,33,37,38                                                                    |
| Hospital/community cohort                 | 7,8,10,13,15,22,23,24,28,29,32,34,39,40,43,45                                  |
| Retrospective study design                | 6,14                                                                           |
| Diagnosis of AMI                          |                                                                                |
| 2 of 3 established criteria*              | 8,9,11,12,13,15,17,18,20,21,22,24,28,30,31,33,35,36,37,38,39,40,41,42,43,44,45 |
| 1 of 3 established criteria*              | 10,19,29                                                                       |
| Discharge diagnosis/ICD-9 codes           | 6,14,16,26,27,34                                                               |
| Did not specify criteria                  | 7,23,32                                                                        |
| <b>Inclusion Criteria</b>                 |                                                                                |
| Specific conditions                       |                                                                                |
| Heart failure                             | 31                                                                             |
| Cardiac arrest                            | 29                                                                             |
| Ventricular fibrillation                  | 43                                                                             |
| Age criteria                              | 11,18,20,21,28,36,38,40,41                                                     |
| Treatment                                 |                                                                                |
| PCI only                                  | 13,29,30                                                                       |
| Streptokinase only                        | 22                                                                             |
| <b>Follow-Up</b>                          |                                                                                |
| Start-point                               |                                                                                |
| Admission                                 | 8,9,10,11 <sup>†</sup> ,12,13,14,17,20,21,22,23,24,26,27,29,32,35,39,42,45     |
| Discharge                                 | 6,10,16,19,30,34,41,43,44                                                      |
| 15 days                                   | 22,38                                                                          |
| 30 days                                   | 7,11,12,13,15,18,21,23,28,33,35,36                                             |
| 3 months                                  | 40                                                                             |
| After onset of heart failure <sup>†</sup> | 31                                                                             |
| After randomization <sup>§</sup>          | 37                                                                             |
| Multiple start points analyzed            | 10,11,12,13,21,22,23,35                                                        |
| Length of follow-up                       |                                                                                |
| <10 years                                 | 6,7,8,9,10,11,12,13,16,18,24,26,27,28,29,30,31,32,33,34,35,36,37               |
| ≥10 years                                 | 14,15,17,19,20,21,22,23,38,39,40,41,42,43,44,45                                |

|                                             |                                                                                |
|---------------------------------------------|--------------------------------------------------------------------------------|
| Source of follow-up data                    |                                                                                |
| Population registries/death certificates    | 11,14,16,17,18,19,20,24,27,28,29,33,34,35,38,40,42,45<br>7,9,10,13,21,31,39,43 |
| Medical records/patient contact             | 6,26,32                                                                        |
| Administrative claims data                  | 8,12,15,23,30,36,37,41,44                                                      |
| Population registries and medical records   | 22                                                                             |
| Not specified                               |                                                                                |
| Provided information on losses to follow-up | 8,9,10,13,15,16,18,19,20,21,27,28,30,33,35,36,39,40,41,45                      |

\* Criteria for diagnosis of AMI included: 1) ischemic symptoms, 2) ECG changes, and 3) elevations in cardiac enzymes

† In study by Hellerman et al, 59% of heart failure episodes occurred within 30 days of MI and 68% within 1 year post-MI

‡ In study by Lowel et al, survival was calculated only among patients who survived first 24 hours of admission.

§ In study by Reynolds et al, median (IQR) time from MI to randomization was 8.5 (5.0, 17.0) in women and 8.0 (5.0, 16.0) in men.

**Supplementary Table S3.** Distribution of risk factors, clinical presentation, and treatment in men vs. women across studies

| Characteristic                          | Higher Percentage in Women                                                    | No Difference Between Genders | Lower Percentage in Women                                 |
|-----------------------------------------|-------------------------------------------------------------------------------|-------------------------------|-----------------------------------------------------------|
| <b>Risk Factors/Comorbid Conditions</b> |                                                                               |                               |                                                           |
| Diabetes Mellitus                       | 6, 11, 12, 13, 16, 18, 19, 20, 21, 24, 26, 27, 32, 34, 37, 39, 40, 42, 44, 45 | 9, 35, 41                     |                                                           |
| History of CHF                          | 6, 9, 16, 24, 26, 37, 42                                                      | 32                            |                                                           |
| Hypertension                            | 6, 9, 11, 12, 16, 18, 19, 20, 21, 24, 32, 34, 37, 39, 41, 42, 44, 45          | 13, 15, 35                    |                                                           |
| Smoking                                 |                                                                               |                               | 9, 11, 12, 13, 15, 18, 19, 32, 34, 35, 37, 39, 41, 42, 45 |
| Prior MI                                |                                                                               | 13                            | 6, 19, 22, 32, 34, 37, 42, 45                             |
| Obesity                                 | 9, 32                                                                         |                               | 35                                                        |
| Angina                                  | 34, 41                                                                        | 12, 15, 19, 21, 37            |                                                           |
| Depression/Psychiatric History          | 24, 32, 40, 41                                                                | 35                            |                                                           |
| Renal Dysfunction                       | 6, 26, 32, 45                                                                 | 16, 42                        |                                                           |
| Hypercholesterolemia                    | 9                                                                             | 12, 13, 37, 45                | 6                                                         |
| <b>Clinical Presentation</b>            |                                                                               |                               |                                                           |
| Killip Class 3 or 4                     | 12, 21, 42                                                                    | 15                            |                                                           |
| Anterior MI                             | 37, 44                                                                        | 12, 13, 15, 19, 21            |                                                           |
| Cardiac Arrest                          |                                                                               | 11, 19                        |                                                           |
| CHF/Pulmonary Edema                     | 15, 24, 37, 44                                                                | 11, 19                        |                                                           |
| Cardiogenic Shock                       | 11, 44                                                                        | 13, 15, 19                    |                                                           |
| Heart block                             | 15                                                                            | 19, 44                        |                                                           |
| Arrhythmias                             |                                                                               | 9, 12, 15, 21, 32, 44         | 19                                                        |
| <b>Treatment</b>                        |                                                                               |                               |                                                           |
| Coronary angiography                    |                                                                               | 21                            | 6, 11, 16, 24, 42                                         |
| CABG                                    |                                                                               | 12, 21, 32, 44                | 6, 9, 11, 16                                              |
| PCI                                     |                                                                               | 9, 11, 32, 45                 | 6, 12, 16, 44                                             |
| Fibrinolytics                           |                                                                               | 32, 45                        | 11, 34, 44                                                |
| <b>In-Hospital Medications</b>          |                                                                               |                               |                                                           |
| Aspirin                                 | 42                                                                            |                               | 34                                                        |
| Beta-blockers                           | 42                                                                            |                               | 11, 12, 34, 44                                            |
| Calcium-channel blockers                | 42                                                                            | 11, 44                        |                                                           |
| Diuretics                               | 11, 34, 42, 44                                                                |                               |                                                           |
| ACE inhibitors                          | 11, 12, 42                                                                    |                               |                                                           |
| Statins                                 |                                                                               | 11                            | 42                                                        |
| Nitrates                                | 42                                                                            | 11                            | 34, 44                                                    |

| Discharge Medications    |                       |                |                        |
|--------------------------|-----------------------|----------------|------------------------|
| Aspirin                  |                       | 9, 16, 37, 45  | 42                     |
| Beta-blockers            |                       | 9, 16, 32, 37  | 11, 12, 24, 34, 42, 45 |
| Calcium-channel blockers | 16, 24, 37, 45        | 9, 11          |                        |
| Diuretics                | 9, 11, 16, 34, 37, 45 |                |                        |
| ACE inhibitors           | 11, 24                | 12, 32, 34, 37 | 16, 42, 45             |
| Statins                  | 11                    | 32, 37         | 24, 34, 42, 45         |
| Nitrates                 | 16, 37, 45            | 9, 11, 24      |                        |

Abbreviations: ACE, angiotensin-converting enzyme; CABG, coronary artery bypass grafting; CHF, congestive heart failure; MI, myocardial infarction; PCI, percutaneous coronary intervention.
